# Supplementary material
Source: MDPI journal article supplement (https://www.mdpi.com/2076-3417/14/5/1724)

## SUPPLEMENTARY MATERIALS

### Section S1

The repeatability of the measurements was assessed using a three-level random effects model for each combination of equivalent soft tissue phantom insert and energy value: first level corresponded to the variability due to the noise ( $e_{ij}$ , with  $i=1,\dots,6$  representing the acquisition and  $j=1,\dots,9$  the slice); second level modeled the variability between slices, nested within acquisitions ( $S_j$  with  $j=1,\dots,9$ ); third level accounted for the variability between acquisitions ( $A_i$  with  $i=1,\dots,6$ ). The equation of the three-level random effects model for the measurement  $y_{jk}$  is the following:

$$y_{ij} = \gamma + A_i + S_j + e_{ij}$$

where  $\gamma$  is the fixed intercept and the other three terms  $A_i$ ,  $S_j$ , and  $e_{ij}$  are described above and are modelled as random variables with gaussian distributions having zero mean and variances  $V_A$ ,  $V_S$ , and  $V_e$ , respectively. The repeatability  $R_G$  of the grouping factors (due to noise, between acquisitions, or across slices within acquisitions) was calculated as

$$R_G = 1 - (V_G / V_T)$$

where  $V_G$  is the variance of the grouping factor  $G$  (namely  $A$ ,  $S$ , or  $e$ ) and  $V_T$  is the total variance, that is the sum of the variances of the three grouping factors. Therefore, the three  $R_G$  need to sum up to 2 and each  $R_G$  can range from 0 (i.e., data variability is totally explained by the grouping factor) to 1 (i.e., grouping factor has no effect on the data variability). In particular, obtaining a repeatability value equal to 1 for the second and third levels of the models would mean that the CT measurement variability is completely independent of the slice and the acquisition.

The three-level regression model indicated that the variation related to between-acquisition heterogeneity was approximately 0 for almost all measurements, as well as that attributed to the slices within acquisition (Supplementary Table S1). This indicates that the measurements were consistent among acquisitions and slices ( $R_G \approx 1$ ), taking into account the noise. The only exception was related to the Siemens Force CT machine when measuring the bone 200 mg insert at 70 keV, for which we obtained a slightly lower repeatability value between acquisitions of 0.89. The repeatability of the measurements was similar when using the iterative algorithms for reconstruction, although lower values were obtained in few cases (see Supplementary Table S1 for details).

**Supplementary Table S1.** Variability of the measurements for each combination of tissue, energy value, and reconstruction method, separately for each CT scanner. Data are mean values and standard deviations estimating the variability due to noise (level 1), across slices within acquisitions (level 2), and between acquisitions (level 3), using a 3-level random effect regression model. Reported values are in Hounsfield units. In parenthesis, corresponding repeatability values are also reported.  
Abbreviations: SD = standard deviation; DE = dual-energy; SE = single-energy; FBP = filtered back-projection; IR = iterative reconstruction.

| Tissue – Energy – Method  | Siemens Confidence |            |            |            |
|---------------------------|--------------------|------------|------------|------------|
|                           | Mean value         | Level-1 SD | Level-2 SD | Level-3 SD |
| Adipose - SE_120kVp - FBP | -70.79             | 15.82 (0)  | 0 (1)      | 0 (1)      |
| Adipose - DE_40keV - FBP  | -137.62            | 34.59 (0)  | 0 (1)      | 0.01 (1)   |
| Adipose - DE_50keV - FBP  | -106.62            | 25.53 (0)  | 0 (1)      | 0.01 (1)   |
| Adipose - DE_70keV - FBP  | -76.08             | 16.67 (0)  | 0 (1)      | 0 (1)      |
| Adipose - DE_100keV - FBP | -60.13             | 15.69 (0)  | 0 (1)      | 0 (1)      |
| Adipose - DE_120keV - FBP | -55.85             | 15.93 (0)  | 0 (1)      | 0 (1)      |
| Adipose - DE_140keV - FBP | -53.50             | 15.96 (0)  | 0 (1)      | 0 (1)      |
| Adipose - SE_120kVp - IR  | -70.81             | 10.11 (0)  | 0 (1)      | 0 (1)      |
| Adipose - DE_40keV - IR   | -137.51            | 22.07 (0)  | 0 (1)      | 0.01 (1)   |
| Adipose - DE_50keV - IR   | -106.48            | 16.18 (0)  | 0 (1)      | 0 (1)      |
| Adipose - DE_70keV - IR   | -76.04             | 10.50 (0)  | 0 (1)      | 0 (1)      |
| Adipose - DE_100keV - IR  | -60.13             | 9.83 (0)   | 0 (1)      | 0 (1)      |
| Adipose - DE_120keV - IR  | -55.89             | 9.98 (0)   | 0 (1)      | 0 (1)      |
| Adipose - DE_140keV - IR  | -53.46             | 10.01 (0)  | 0 (1)      | 0 (1)      |
| Breast - SE_120kVp - FBP  | -29.15             | 13.80 (0)  | 0 (1)      | 0 (1)      |
| Breast - DE_40keV - FBP   | -66.28             | 30.58 (0)  | 0 (1)      | 0.01 (1)   |
| Breast - DE_50keV - FBP   | -48.87             | 22.65 (0)  | 0 (1)      | 0.01 (1)   |
| Breast - DE_70keV - FBP   | -31.62             | 14.86 (0)  | 0 (1)      | 0 (1)      |
| Breast - DE_100keV - FBP  | -22.65             | 14.34 (0)  | 0 (1)      | 0 (1)      |
| Breast - DE_120keV - FBP  | -20.24             | 14.63 (0)  | 0 (1)      | 0 (1)      |
| Breast - DE_140keV - FBP  | -18.91             | 14.66 (0)  | 0 (1)      | 0 (1)      |
| Breast - SE_120kVp - IR   | -28.95             | 8.79 (0)   | 0 (1)      | 0 (1)      |
| Breast - DE_40keV - IR    | -66.37             | 19.40 (0)  | 0 (1)      | 0.01 (1)   |
| Breast - DE_50keV - IR    | -48.79             | 14.30 (0)  | 0 (1)      | 0 (1)      |
| Breast - DE_70keV - IR    | -31.51             | 9.37 (0)   | 0 (1)      | 0 (1)      |
| Breast - DE_100keV - IR   | -22.05             | 9.01 (0)   | 0 (1)      | 0 (1)      |
| Breast - DE_120keV - IR   | -20.10             | 9.18 (0)   | 0 (1)      | 0 (1)      |
| Breast - DE_140keV - IR   | -18.76             | 9.21 (0)   | 0 (1)      | 0 (1)      |
| Liver - SE_120kVp - FBP   | 58.20              | 18.19 (0)  | 0 (1)      | 0 (1)      |
| Liver - DE_40keV - FBP    | 66.66              | 40.97 (0)  | 0 (1)      | 0.01 (1)   |
| Liver - DE_50keV - FBP    | 63.54              | 30.27 (0)  | 0 (1)      | 0 (1)      |
| Liver - DE_70keV - FBP    | 60.59              | 19.79 (0)  | 0 (1)      | 0.01 (1)   |
| Liver - DE_100keV - FBP   | 59.06              | 18.54 (0)  | 0 (1)      | 0.01 (1)   |

|                               |        |           |       |          |
|-------------------------------|--------|-----------|-------|----------|
| Liver - DE_120keV - FBP       | 58.65  | 18.82 (0) | 0 (1) | 0.01 (1) |
| Liver - DE_140keV - FBP       | 58.42  | 18.84 (0) | 0 (1) | 0.01 (1) |
| Liver - SE_120kVp - IR        | 58.43  | 11.63 (0) | 0 (1) | 0 (1)    |
| Liver - DE_40keV - IR         | 65.94  | 26.27 (0) | 0 (1) | 0.01 (1) |
| Liver - DE_50keV - IR         | 63.24  | 19.31 (0) | 0 (1) | 0.01 (1) |
| Liver - DE_70keV - IR         | 60.59  | 12.56 (0) | 0 (1) | 0 (1)    |
| Liver - DE_100keV - IR        | 59.22  | 11.69 (0) | 0 (1) | 0 (1)    |
| Liver - DE_120keV - IR        | 58.87  | 11.86 (0) | 0 (1) | 0 (1)    |
| Liver - DE_140keV - IR        | 58.66  | 11.88 (0) | 0 (1) | 0 (1)    |
| Muscle - SE_120kVp - FBP      | 45.91  | 15.30 (0) | 0 (1) | 0 (1)    |
| Muscle - DE_40keV - FBP       | 53.16  | 33.53 (0) | 0 (1) | 0 (1)    |
| Muscle - DE_50keV - FBP       | 50.67  | 24.89 (0) | 0 (1) | 0 (1)    |
| Muscle - DE_70keV - FBP       | 48.37  | 16.36 (0) | 0 (1) | 0 (1)    |
| Muscle - DE_100keV - FBP      | 47.16  | 15.11 (0) | 0 (1) | 0 (1)    |
| Muscle - DE_120keV - FBP      | 46.85  | 15.28 (0) | 0 (1) | 0 (1)    |
| Muscle - DE_140keV - FBP      | 46.67  | 15.29 (0) | 0 (1) | 0 (1)    |
| Muscle - SE_120kVp - IR       | 46.20  | 9.77 (0)  | 0 (1) | 0 (1)    |
| Muscle - DE_40keV - IR        | 53.48  | 21.21 (0) | 0 (1) | 0.01 (1) |
| Muscle - DE_50keV - IR        | 50.95  | 15.67 (0) | 0 (1) | 0 (1)    |
| Muscle - DE_70keV - IR        | 48.59  | 10.29 (0) | 0 (1) | 0 (1)    |
| Muscle - DE_100keV - IR       | 47.34  | 9.45 (0)  | 0 (1) | 0 (1)    |
| Muscle - DE_120keV - IR       | 47.03  | 9.57 (0)  | 0 (1) | 0 (1)    |
| Muscle - DE_140keV - IR       | 46.85  | 9.60 (0)  | 0 (1) | 0 (1)    |
| Bone 200 mg - SE_120kVp - FBP | 203.07 | 16.50 (0) | 0 (1) | 0 (1)    |
| Bone 200 mg - DE_40keV - FBP  | 515.21 | 52.15 (0) | 0 (1) | 0.01 (1) |
| Bone 200 mg - DE_50keV - FBP  | 373.29 | 35.04 (0) | 0 (1) | 0.01 (1) |
| Bone 200 mg - DE_70keV - FBP  | 233.95 | 18.27 (0) | 0 (1) | 0 (1)    |
| Bone 200 mg - DE_100keV - FBP | 161.52 | 16.79 (0) | 0 (1) | 0 (1)    |
| Bone 200 mg - DE_120keV - FBP | 142.22 | 16.42 (0) | 0 (1) | 0 (1)    |
| Bone 200 mg - DE_140keV - FBP | 131.54 | 16.04 (0) | 0 (1) | 0 (1)    |
| Bone 200 mg - SE_120kVp - IR  | 202.59 | 10.54 (0) | 0 (1) | 0 (1)    |
| Bone 200 mg - DE_40keV - IR   | 515.56 | 32.79 (0) | 0 (1) | 0.01 (1) |
| Bone 200 mg - DE_50keV - IR   | 373.40 | 22.03 (0) | 0 (1) | 0.01 (1) |
| Bone 200 mg - DE_70keV - IR   | 233.64 | 11.51 (0) | 0 (1) | 0 (1)    |
| Bone 200 mg - DE_100keV - IR  | 161.01 | 10.55 (0) | 0 (1) | 0 (1)    |
| Bone 200 mg - DE_120keV - IR  | 141.64 | 10.33 (0) | 0 (1) | 0 (1)    |
| Bone 200 mg - DE_140keV - IR  | 130.91 | 10.11 (0) | 0 (1) | 0 (1)    |

**Supplementary Table S1 (continued)**

| Tissue – Energy – Method  | Siemens Edge |            |            |            |
|---------------------------|--------------|------------|------------|------------|
|                           | Mean         | Level-1 SD | Level-2 SD | Level-3 SD |
| Adipose - SE_120kVp - FBP | -71.55       | 14.80 (0)  | 0 (1)      | 0 (1)      |
| Adipose - DE_40keV - FBP  | -162.15      | 35.40 (0)  | 0 (1)      | 0 (1)      |
| Adipose - DE_50keV - FBP  | -119.64      | 25.15 (0)  | 0 (1)      | 0 (1)      |
| Adipose - DE_70keV - FBP  | -77.94       | 16.63 (0)  | 0 (1)      | 0 (1)      |
| Adipose - DE_100keV - FBP | -56.03       | 12.59 (0)  | 0 (1)      | 0 (1)      |
| Adipose - DE_120keV - FBP | -50.22       | 12.75 (0)  | 0 (1)      | 0 (1)      |
| Adipose - DE_140keV - FBP | -47.00       | 12.80 (0)  | 0 (1)      | 0 (1)      |
| Adipose - SE_120kVp - IR  | -71.63       | 9.44 (0)   | 0 (1)      | 0 (1)      |
| Adipose - DE_40keV - IR   | -162.57      | 24.24 (0)  | 0 (1)      | 0 (1)      |
| Adipose - DE_50keV - IR   | -119.85      | 17.15 (0)  | 0 (1)      | 0 (1)      |
| Adipose - DE_70keV - IR   | -77.95       | 11.22 (0)  | 0 (1)      | 0 (1)      |
| Adipose - DE_100keV - IR  | -55.96       | 8.51 (0)   | 0 (1)      | 0 (1)      |
| Adipose - DE_120keV - IR  | -50.13       | 8.63 (0)   | 0 (1)      | 0 (1)      |
| Adipose - DE_140keV - IR  | -46.88       | 8.68 (0)   | 0 (1)      | 0 (1)      |
| Breast - SE_120kVp - FBP  | -25.13       | 14.08 (0)  | 0 (1)      | 0 (1)      |
| Breast - DE_40keV - FBP   | -101.61      | 29.07 (0)  | 0 (1)      | 0.01 (1)   |
| Breast - DE_50keV - FBP   | -67.64       | 20.98 (0)  | 0 (1)      | 0.01 (1)   |
| Breast - DE_70keV - FBP   | -34.21       | 14.16 (0)  | 0 (1)      | 0 (1)      |
| Breast - DE_100keV - FBP  | -16.93       | 11.41 (0)  | 0 (1)      | 0 (1)      |
| Breast - DE_120keV - FBP  | -12.31       | 11.66 (0)  | 0 (1)      | 0 (1)      |
| Breast - DE_140keV - FBP  | -9.74        | 11.75 (0)  | 0 (1)      | 0 (1)      |
| Breast - SE_120kVp - IR   | -24.94       | 8.88 (0)   | 0 (1)      | 0 (1)      |
| Breast - DE_40keV - IR    | -101.35      | 19.60 (0)  | 0 (1)      | 0.01 (1)   |
| Breast - DE_50keV - IR    | -67.47       | 14.19 (0)  | 0 (1)      | 0 (1)      |
| Breast - DE_70keV - IR    | -34.12       | 9.53 (0)   | 0 (1)      | 0 (1)      |
| Breast - DE_100keV - IR   | -16.87       | 7.61 (0)   | 0 (1)      | 0 (1)      |
| Breast - DE_120keV - IR   | -12.27       | 7.78 (0)   | 0 (1)      | 0 (1)      |
| Breast - DE_140keV - IR   | -9.71        | 7.85 (0)   | 0 (1)      | 0 (1)      |
| Liver - SE_120kVp - FBP   | 53.32        | 17.43 (0)  | 0 (1)      | 0.01 (1)   |
| Liver - DE_40keV - FBP    | 60.61        | 40.32 (0)  | 0 (1)      | 0 (1)      |
| Liver - DE_50keV - FBP    | 60.88        | 29.49 (0)  | 0 (1)      | 0 (1)      |
| Liver - DE_70keV - FBP    | 61.20        | 20.19 (0)  | 0 (1)      | 0 (1)      |
| Liver - DE_100keV - FBP   | 61.48        | 15.07 (0)  | 0 (1)      | 0 (1)      |
| Liver - DE_120keV - FBP   | 61.56        | 15.25 (0)  | 0 (1)      | 0 (1)      |

|                               |        |              |          |             |
|-------------------------------|--------|--------------|----------|-------------|
| Liver - DE_140keV - FBP       | 61.61  | 15.32 (0)    | 0 (1)    | 0 (1)       |
| Liver - SE_120kVp - IR        | 53.09  | 11.07 (0.02) | 0.03 (1) | 1.38 (0.98) |
| Liver - DE_40keV - IR         | 61.96  | 28.44 (0)    | 0 (1)    | 0 (1)       |
| Liver - DE_50keV - IR         | 61.77  | 20.66 (0)    | 0 (1)    | 0 (1)       |
| Liver - DE_70keV - IR         | 61.49  | 13.90 (0)    | 0 (1)    | 0 (1)       |
| Liver - DE_100keV - IR        | 61.46  | 10.31 (0)    | 0 (1)    | 0 (1)       |
| Liver - DE_120keV - IR        | 61.47  | 10.43 (0)    | 0 (1)    | 0 (1)       |
| Liver - DE_140keV - IR        | 61.47  | 10.49 (0)    | 0 (1)    | 0 (1)       |
| Muscle - SE_120kVp - FBP      | 46.91  | 14.85 (0)    | 0 (1)    | 0 (1)       |
| Muscle - DE_40keV - FBP       | 45.48  | 32.87 (0)    | 0 (1)    | 0.01 (1)    |
| Muscle - DE_50keV - FBP       | 46.83  | 24.01 (0)    | 0 (1)    | 0.01 (1)    |
| Muscle - DE_70keV - FBP       | 48.42  | 16.12 (0)    | 0 (1)    | 0 (1)       |
| Muscle - DE_100keV - FBP      | 49.16  | 12.44 (0)    | 0 (1)    | 0 (1)       |
| Muscle - DE_120keV - FBP      | 49.34  | 12.64 (0)    | 0 (1)    | 0 (1)       |
| Muscle - DE_140keV - FBP      | 49.43  | 12.72 (0)    | 0 (1)    | 0 (1)       |
| Muscle - SE_120kVp - IR       | 46.88  | 9.38 (0)     | 0 (1)    | 0 (1)       |
| Muscle - DE_40keV - IR        | 45.88  | 22.53 (0)    | 0 (1)    | 0.01 (1)    |
| Muscle - DE_50keV - IR        | 47.08  | 16.35 (0)    | 0 (1)    | 0 (1)       |
| Muscle - DE_70keV - IR        | 48.53  | 10.82 (0)    | 0 (1)    | 0 (1)       |
| Muscle - DE_100keV - IR       | 49.23  | 8.38 (0)     | 0 (1)    | 0 (1)       |
| Muscle - DE_120keV - IR       | 49.38  | 8.54 (0)     | 0 (1)    | 0 (1)       |
| Muscle - DE_140keV - IR       | 49.47  | 8.60 (0)     | 0 (1)    | 0 (1)       |
| Bone 200 mg - SE_120kVp - FBP | 193.26 | 15.95 (0)    | 0 (1)    | 0.01 (1)    |
| Bone 200 mg - DE_40keV - FBP  | 587.95 | 50.36 (0)    | 0 (1)    | 0.01 (1)    |
| Bone 200 mg - DE_50keV - FBP  | 415.73 | 33.78 (0)    | 0 (1)    | 0.01 (1)    |
| Bone 200 mg - DE_70keV - FBP  | 246.37 | 17.61 (0)    | 0 (1)    | 0 (1)       |
| Bone 200 mg - DE_100keV - FBP | 158.27 | 13.46 (0)    | 0 (1)    | 0 (1)       |
| Bone 200 mg - DE_120keV - FBP | 134.82 | 13.57 (0)    | 0 (1)    | 0 (1)       |
| Bone 200 mg - DE_140keV - FBP | 121.82 | 13.55 (0)    | 0 (1)    | 0 (1)       |
| Bone 200 mg - SE_120kVp - IR  | 192.41 | 10.13 (0.04) | 0.04 (1) | 2.10 (0.96) |
| Bone 200 mg - DE_40keV - IR   | 585.77 | 34.53 (0)    | 0 (1)    | 0.01 (1)    |
| Bone 200 mg - DE_50keV - IR   | 414.21 | 23.14 (0)    | 0 (1)    | 0.01 (1)    |
| Bone 200 mg - DE_70keV - IR   | 245.50 | 12.06 (0)    | 0 (1)    | 0 (1)       |
| Bone 200 mg - DE_100keV - IR  | 157.74 | 9.15 (0)     | 0 (1)    | 0 (1)       |
| Bone 200 mg - DE_120keV - IR  | 134.38 | 9.23 (0)     | 0 (1)    | 0 (1)       |
| Bone 200 mg - DE_140keV - IR  | 121.43 | 9.24 (0)     | 0 (1)    | 0 (1)       |

**Supplementary Table S1 (continued)**

| Tissue – Energy – Method  | Siemens Force |              |            |             |
|---------------------------|---------------|--------------|------------|-------------|
|                           | Mean          | Level-1 SD   | Level-2 SD | Level-3 SD  |
| Adipose - SE_120kVp - FBP | -68.77        | 15.14 (0)    | 0 (1)      | 0 (1)       |
| Adipose - DE_40keV - FBP  | -125.18       | 27.93 (0)    | 0 (1)      | 0.01 (1)    |
| Adipose - DE_50keV - FBP  | -93.2         | 18.79 (0)    | 0 (1)      | 0.01 (1)    |
| Adipose - DE_70keV - FBP  | -66.82        | 12.74 (0)    | 0 (1)      | 0 (1)       |
| Adipose - DE_100keV - FBP | -54.04        | 10.87 (0)    | 0 (1)      | 0.01 (1)    |
| Adipose - DE_120keV - FBP | -50.40        | 10.85 (0)    | 0 (1)      | 0.01 (1)    |
| Adipose - DE_140keV - FBP | -48.49        | 10.90 (0)    | 0.01 (1)   | 0.01 (1)    |
| Adipose - SE_120kVp - IR  | -68.82        | 10.02 (0)    | 0 (1)      | 0 (1)       |
| Adipose - DE_40keV - IR   | -122.00       | 19.61 (0.02) | 0.02 (1)   | 3.06 (0.98) |
| Adipose - DE_50keV - IR   | -91.88        | 13.93 (0.02) | 0.05 (1)   | 2.13 (0.98) |
| Adipose - DE_70keV - IR   | -66.64        | 8.62 (0)     | 0 (1)      | 0 (1)       |
| Adipose - DE_100keV - IR  | -53.70        | 7.38 (0)     | 0 (1)      | 0 (1)       |
| Adipose - DE_120keV - IR  | -50.28        | 7.42 (0.04)  | 0.02 (1)   | 1.48 (0.96) |
| Adipose - DE_140keV - IR  | -48.38        | 7.47 (0.07)  | 0.01 (1)   | 2.02 (0.93) |
| Breast - SE_120kVp - FBP  | -28.53        | 12.77 (0)    | 0 (1)      | 0 (1)       |
| Breast - DE_40keV - FBP   | -62.89        | 26.3 (0)     | 0 (1)      | 0.01 (1)    |
| Breast - DE_50keV - FBP   | -45.82        | 17.46 (0)    | 0 (1)      | 0.01 (1)    |
| Breast - DE_70keV - FBP   | -27.34        | 12.12 (0)    | 0 (1)      | 0 (1)       |
| Breast - DE_100keV - FBP  | -18.15        | 10.08 (0)    | 0 (1)      | 0 (1)       |
| Breast - DE_120keV - FBP  | -16.77        | 10.03 (0)    | 0 (1)      | 0 (1)       |
| Breast - DE_140keV - FBP  | -14.16        | 10.05 (0)    | 0 (1)      | 0 (1)       |
| Breast - SE_120kVp - IR   | -28.47        | 8.35 (0)     | 0 (1)      | 0 (1)       |
| Breast - DE_40keV - IR    | -62.88        | 17.67 (0.03) | 0.03 (1)   | 3.15 (0.97) |
| Breast - DE_50keV - IR    | -45.01        | 12.89 (0)    | 0 (1)      | 0.03 (1)    |
| Breast - DE_70keV - IR    | -27.46        | 8.12 (0)     | 0 (1)      | 0 (1)       |
| Breast - DE_100keV - IR   | -18.30        | 6.77 (0)     | 0 (1)      | 0 (1)       |
| Breast - DE_120keV - IR   | -15.93        | 6.79 (0)     | 0 (1)      | 0 (1)       |
| Breast - DE_140keV - IR   | -14.61        | 6.83 (0)     | 0 (1)      | 0 (1)       |
| Liver - SE_120kVp - FBP   | 61.87         | 17.62 (0)    | 0 (1)      | 0 (1)       |
| Liver - DE_40keV - FBP    | 72.95         | 31.23 (0)    | 0 (1)      | 0.01 (1)    |
| Liver - DE_50keV - FBP    | 68.29         | 20.83 (0)    | 0 (1)      | 0.01 (1)    |
| Liver - DE_70keV - FBP    | 63.91         | 14.71 (0)    | 0 (1)      | 0 (1)       |
| Liver - DE_100keV - FBP   | 61.49         | 13.39 (0)    | 0 (1)      | 0 (1)       |
| Liver - DE_120keV - FBP   | 60.76         | 13.42 (0)    | 0 (1)      | 0 (1)       |
| Liver - DE_140keV - FBP   | 60.38         | 13.48 (0)    | 0 (1)      | 0 (1)       |

|                               |        |              |          |             |
|-------------------------------|--------|--------------|----------|-------------|
| Liver - SE_120kVp - IR        | 62.05  | 11.64 (0)    | 0 (1)    | 0 (1)       |
| Liver - DE_40keV - IR         | 73.58  | 21.47 (0)    | 0 (1)    | 0.01 (1)    |
| Liver - DE_50keV - IR         | 68.34  | 15.38 (0)    | 0 (1)    | 0 (1)       |
| Liver - DE_70keV - IR         | 63.93  | 9.83 (0)     | 0 (1)    | 0 (1)       |
| Liver - DE_100keV - IR        | 61.74  | 9.04 (0)     | 0 (1)    | 0 (1)       |
| Liver - DE_120keV - IR        | 61.15  | 9.12 (0)     | 0 (1)    | 0 (1)       |
| Liver - DE_140keV - IR        | 60.82  | 9.19 (0)     | 0 (1)    | 0 (1)       |
| Muscle - SE_120kVp - FBP      | 50.49  | 13.26 (0)    | 0 (1)    | 0 (1)       |
| Muscle - DE_40keV - FBP       | 73.56  | 27.06 (0)    | 0.01 (1) | 0 (1)       |
| Muscle - DE_50keV - FBP       | 65.68  | 18.09 (0)    | 0 (1)    | 0 (1)       |
| Muscle - DE_70keV - FBP       | 55.41  | 12.68 (0)    | 0 (1)    | 0 (1)       |
| Muscle - DE_100keV - FBP      | 50.40  | 10.54 (0)    | 0 (1)    | 0 (1)       |
| Muscle - DE_120keV - FBP      | 48.77  | 10.45 (0)    | 0 (1)    | 0 (1)       |
| Muscle - DE_140keV - FBP      | 48.16  | 10.45 (0)    | 0 (1)    | 0 (1)       |
| Muscle - SE_120kVp - IR       | 50.60  | 8.68 (0)     | 0 (1)    | 0 (1)       |
| Muscle - DE_40keV - IR        | 73.35  | 18.32 (0.03) | 0.03 (1) | 3.46 (0.97) |
| Muscle - DE_50keV - IR        | 64.25  | 13.36 (0.03) | 0.05 (1) | 2.51 (0.97) |
| Muscle - DE_70keV - IR        | 55.26  | 8.55 (0)     | 0 (1)    | 0 (1)       |
| Muscle - DE_100keV - IR       | 50.80  | 7.07 (0)     | 0 (1)    | 0 (1)       |
| Muscle - DE_120keV - IR       | 49.56  | 7.02 (0)     | 0 (1)    | 0 (1)       |
| Muscle - DE_140keV - IR       | 48.86  | 7.05 (0)     | 0 (1)    | 0 (1)       |
| Bone 200 mg - SE_120kVp - FBP | 214.49 | 16.02 (0)    | 0 (1)    | 0 (1)       |
| Bone 200 mg - DE_40keV - FBP  | 557.07 | 37.65 (0)    | 0 (1)    | 0.01 (1)    |
| Bone 200 mg - DE_50keV - FBP  | 390.68 | 23.12 (0)    | 0 (1)    | 0.01 (1)    |
| Bone 200 mg - DE_70keV - FBP  | 227.17 | 12.91 (0.11) | 0 (1)    | 4.47 (0.89) |
| Bone 200 mg - DE_100keV - FBP | 141.58 | 11.90 (0.14) | 0 (1)    | 4.81 (0.86) |
| Bone 200 mg - DE_120keV - FBP | 116.65 | 12.15 (0.10) | 0 (1)    | 4.10 (0.90) |
| Bone 200 mg - DE_140keV - FBP | 104.00 | 12.35 (0.40) | 0.08 (1) | 9.98 (0.60) |
| Bone 200 mg - SE_120kVp - IR  | 214.20 | 10.60 (0)    | 0 (1)    | 0 (1)       |
| Bone 200 mg - DE_40keV - IR   | 558.96 | 26.11 (0)    | 0 (1)    | 0.01 (1)    |
| Bone 200 mg - DE_50keV - IR   | 390.66 | 17.31 (0)    | 0.01 (1) | 0 (1)       |
| Bone 200 mg - DE_70keV - IR   | 226.32 | 8.78 (0.25)  | 0.05 (1) | 5.09 (0.75) |
| Bone 200 mg - DE_100keV - IR  | 140.73 | 8.18 (0.31)  | 0.04 (1) | 5.48 (0.69) |
| Bone 200 mg - DE_120keV - IR  | 117.99 | 8.41 (0.30)  | 0.09 (1) | 5.52 (0.70) |
| Bone 200 mg - DE_140keV - IR  | 105.37 | 8.57 (0.30)  | 0.03 (1) | 5.55 (0.70) |

**Supplementary Table S1 (continued)**

| Tissue – Energy – Method  | GE Revolution GSI |            |            |            |
|---------------------------|-------------------|------------|------------|------------|
|                           | Mean              | Level-1 SD | Level-2 SD | Level-3 SD |
| Adipose - SE_120kVp - FBP | -72.35            | 19.00 (0)  | 0 (1)      | 0.01 (1)   |
| Adipose - DE_40keV - FBP  | -147.50           | 35.83 (0)  | 0 (1)      | 0 (1)      |
| Adipose - DE_50keV - FBP  | -112.60           | 24.88 (0)  | 0 (1)      | 0.01 (1)   |
| Adipose - DE_70keV - FBP  | -77.36            | 12.74 (0)  | 0 (1)      | 0 (1)      |
| Adipose - DE_100keV - FBP | -60.22            | 10.14 (0)  | 0 (1)      | 0 (1)      |
| Adipose - DE_120keV - FBP | -55.34            | 8.81 (0)   | 0 (1)      | 0 (1)      |
| Adipose - DE_140keV - FBP | -52.74            | 8.12 (0)   | 0 (1)      | 0 (1)      |
| Adipose - SE_120kVp - IR  | -72.12            | 11.73 (0)  | 0 (1)      | 0 (1)      |
| Adipose - DE_40keV - IR   | -147.20           | 32.41 (0)  | 0 (1)      | 0.01 (1)   |
| Adipose - DE_50keV - IR   | -112.30           | 22.98 (0)  | 0 (1)      | 0.01 (1)   |
| Adipose - DE_70keV - IR   | -77.43            | 7.78 (0)   | 0 (1)      | 0 (1)      |
| Adipose - DE_100keV - IR  | -60.14            | 9.19 (0)   | 0 (1)      | 0 (1)      |
| Adipose - DE_120keV - IR  | -55.45            | 8.07 (0)   | 0 (1)      | 0 (1)      |
| Adipose - DE_140keV - IR  | -53.01            | 7.52 (0)   | 0 (1)      | 0 (1)      |
| Breast - SE_120kVp - FBP  | -30.02            | 17.15 (0)  | 0 (1)      | 0 (1)      |
| Breast - DE_40keV - FBP   | -69.31            | 32.60 (0)  | 0 (1)      | 0 (1)      |
| Breast - DE_50keV - FBP   | -51.20            | 23.07 (0)  | 0 (1)      | 0.01 (1)   |
| Breast - DE_70keV - FBP   | -33.23            | 11.65 (0)  | 0 (1)      | 0 (1)      |
| Breast - DE_100keV - FBP  | -23.75            | 9.04 (0)   | 0 (1)      | 0 (1)      |
| Breast - DE_120keV - FBP  | -21.34            | 7.90 (0)   | 0 (1)      | 0 (1)      |
| Breast - DE_140keV - FBP  | -20.03            | 7.35 (0)   | 0 (1)      | 0 (1)      |
| Breast - SE_120kVp - IR   | -30.11            | 10.71 (0)  | 0 (1)      | 0 (1)      |
| Breast - DE_40keV - IR    | -69.92            | 29.91 (0)  | 0 (1)      | 0 (1)      |
| Breast - DE_50keV - IR    | -51.47            | 20.90 (0)  | 0 (1)      | 0.01 (1)   |
| Breast - DE_70keV - IR    | -33.14            | 7.11 (0)   | 0 (1)      | 0 (1)      |
| Breast - DE_100keV - IR   | -23.84            | 8.33 (0)   | 0 (1)      | 0 (1)      |
| Breast - DE_120keV - IR   | -21.33            | 7.25 (0)   | 0 (1)      | 0 (1)      |
| Breast - DE_140keV - IR   | -19.93            | 6.75 (0)   | 0 (1)      | 0 (1)      |
| Liver - SE_120kVp - FBP   | 63.52             | 22.81 (0)  | 0 (1)      | 0.01 (1)   |
| Liver - DE_40keV - FBP    | 84.79             | 38.88 (0)  | 0 (1)      | 0.01 (1)   |
| Liver - DE_50keV - FBP    | 72.77             | 27.05 (0)  | 0 (1)      | 0.01 (1)   |
| Liver - DE_70keV - FBP    | 60.69             | 14.04 (0)  | 0 (1)      | 0 (1)      |
| Liver - DE_100keV - FBP   | 56.27             | 10.75 (0)  | 0 (1)      | 0 (1)      |
| Liver - DE_120keV - FBP   | 54.69             | 9.47 (0)   | 0 (1)      | 0 (1)      |



|                               |        |           |       |          |
|-------------------------------|--------|-----------|-------|----------|
| Liver - DE_140keV - FBP       | 53.74  | 8.80 (0)  | 0 (1) | 0 (1)    |
| Liver - SE_120kVp - IR        | 63.44  | 13.67 (0) | 0 (1) | 0 (1)    |
| Liver - DE_40keV - IR         | 84.04  | 32.84 (0) | 0 (1) | 0.01 (1) |
| Liver - DE_50keV - IR         | 73.59  | 23.24 (0) | 0 (1) | 0.01 (1) |
| Liver - DE_70keV - IR         | 60.95  | 8.44 (0)  | 0 (1) | 0 (1)    |
| Liver - DE_100keV - IR        | 56.09  | 9.17 (0)  | 0 (1) | 0 (1)    |
| Liver - DE_120keV - IR        | 54.62  | 8.26 (0)  | 0 (1) | 0 (1)    |
| Liver - DE_140keV - IR        | 53.62  | 7.67 (0)  | 0 (1) | 0 (1)    |
| Muscle - SE_120kVp - FBP      | 49.65  | 19.1 (0)  | 0 (1) | 0.01 (1) |
| Muscle - DE_40keV - FBP       | 68.00  | 33.52 (0) | 0 (1) | 0 (1)    |
| Muscle - DE_50keV - FBP       | 57.13  | 23.58 (0) | 0 (1) | 0 (1)    |
| Muscle - DE_70keV - FBP       | 46.19  | 12.33 (0) | 0 (1) | 0 (1)    |
| Muscle - DE_100keV - FBP      | 42.17  | 9.42 (0)  | 0 (1) | 0 (1)    |
| Muscle - DE_120keV - FBP      | 40.74  | 8.18 (0)  | 0 (1) | 0 (1)    |
| Muscle - DE_140keV - FBP      | 39.97  | 7.51 (0)  | 0 (1) | 0 (1)    |
| Muscle - SE_120kVp - IR       | 49.64  | 11.88 (0) | 0 (1) | 0 (1)    |
| Muscle - DE_40keV - IR        | 67.02  | 30.73 (0) | 0 (1) | 0.01 (1) |
| Muscle - DE_50keV - IR        | 57.09  | 21.37 (0) | 0 (1) | 0.01 (1) |
| Muscle - DE_70keV - IR        | 46.27  | 7.45 (0)  | 0 (1) | 0 (1)    |
| Muscle - DE_100keV - IR       | 41.97  | 8.58 (0)  | 0 (1) | 0 (1)    |
| Muscle - DE_120keV - IR       | 40.62  | 7.32 (0)  | 0 (1) | 0 (1)    |
| Muscle - DE_140keV - IR       | 39.90  | 6.78 (0)  | 0 (1) | 0 (1)    |
| Bone 200 mg - SE_120kVp - FBP | 215.95 | 29.15 (0) | 0 (1) | 0.01 (1) |
| Bone 200 mg - DE_40keV - FBP  | 524.65 | 37.28 (0) | 0 (1) | 0 (1)    |
| Bone 200 mg - DE_50keV - FBP  | 376.07 | 25.71 (0) | 0 (1) | 0.01 (1) |
| Bone 200 mg - DE_70keV - FBP  | 223.25 | 13.25 (0) | 0 (1) | 0 (1)    |
| Bone 200 mg - DE_100keV - FBP | 146.20 | 10.08 (0) | 0 (1) | 0 (1)    |
| Bone 200 mg - DE_120keV - FBP | 125.84 | 8.79 (0)  | 0 (1) | 0 (1)    |
| Bone 200 mg - DE_140keV - FBP | 114.20 | 8.13 (0)  | 0 (1) | 0 (1)    |
| Bone 200 mg - SE_120kVp - IR  | 215.74 | 17.96 (0) | 0 (1) | 0 (1)    |
| Bone 200 mg - DE_40keV - IR   | 525.51 | 33.46 (0) | 0 (1) | 0.01 (1) |
| Bone 200 mg - DE_50keV - IR   | 373.51 | 23.21 (0) | 0 (1) | 0.01 (1) |
| Bone 200 mg - DE_70keV - IR   | 223.22 | 8.07 (0)  | 0 (1) | 0 (1)    |
| Bone 200 mg - DE_100keV - IR  | 146.16 | 8.94 (0)  | 0 (1) | 0 (1)    |
| Bone 200 mg - DE_120keV - IR  | 125.78 | 7.84 (0)  | 0 (1) | 0 (1)    |
| Bone 200 mg - DE_140keV - IR  | 114.19 | 7.25 (0)  | 0 (1) | 0 (1)    |

**Supplementary Table S2.** RMSE obtained with Iterative reconstructions.

| Tissue and energy level   | RMSE (HU)          |               |              |                   |
|---------------------------|--------------------|---------------|--------------|-------------------|
|                           | Siemens Confidence | Siemens Force | Siemens Edge | GE Revolution GSI |
| <b><u>Adipose</u></b>     |                    |               |              |                   |
| 40 keV                    | 15                 | 34            | 14           | 5                 |
| 50 keV                    | 5                  | 20            | 11           | 3                 |
| 70 keV                    | 1                  | 9             | 3            | 2                 |
| 100 keV                   | 1                  | 6             | 3            | 2                 |
| 120 keV                   | 1                  | 6             | 5            | 2                 |
| 140 keV                   | 1                  | 5             | 6            | 1                 |
| <b><u>Breast</u></b>      |                    |               |              |                   |
| 40 keV                    | 22                 | 26            | 14           | 18                |
| 50 keV                    | 13                 | 18            | 6            | 11                |
| 70 keV                    | 9                  | 13            | 6            | 7                 |
| 100 keV                   | 7                  | 12            | 13           | 6                 |
| 120 keV                   | 7                  | 12            | 15           | 6                 |
| 140 keV                   | 7                  | 12            | 16           | 6                 |
| <b><u>Muscle</u></b>      |                    |               |              |                   |
| 40 keV                    | 4                  | 21            | 17           | 14                |
| 50 keV                    | 2                  | 15            | 9            | 7                 |
| 70 keV                    | 4                  | 10            | 1            | 2                 |
| 100 keV                   | 4                  | 7             | 5            | 2                 |
| 120 keV                   | 4                  | 7             | 6            | 3                 |
| 140 keV                   | 4                  | 6             | 6            | 4                 |
| <b><u>Liver</u></b>       |                    |               |              |                   |
| 40 keV                    | 4                  | 12            | 14           | 21                |
| 50 keV                    | 5                  | 9             | 8            | 14                |
| 70 keV                    | 6                  | 9             | 7            | 7                 |
| 100 keV                   | 7                  | 9             | 9            | 4                 |
| 120 keV                   | 7                  | 9             | 9            | 3                 |
| 140 keV                   | 6                  | 8             | 9            | 2                 |
| <b><u>Bone 200 mg</u></b> |                    |               |              |                   |
| 40 keV                    | 170                | 127           | 100          | 161               |
| 50 keV                    | 89                 | 72            | 49           | 90                |
| 70 keV                    | 32                 | 39            | 20           | 42                |
| 100 keV                   | 14                 | 35            | 17           | 29                |
| 120 keV                   | 11                 | 35            | 18           | 27                |
| 140 keV                   | 11                 | 37            | 20           | 28                |

Abbreviations: RMSE = root mean square error.

**Supplementary Table S3.** Mean difference (with unadjusted 95% confidence interval) between each of three low energy levels (40, 50, and 70 keV) of DECT with respect to SECT of other pairwise comparison of five tissue-equivalent inserts for four CT machines, using FBP reconstruction method. Bold numbers indicate differences between DECT and SECT with statistical significance (p-value < 0.05/30 after multiple comparison correction with Bonferroni procedure).

| Tissue Comparison      | DECT Level vs SECT images | Mean difference in HU (95% CI) |                             |                             |                             |
|------------------------|---------------------------|--------------------------------|-----------------------------|-----------------------------|-----------------------------|
|                        |                           | Confidence                     | Edge                        | Force                       | Revolution GSI              |
| Adipose vs Bone 200 mg | 40 keV                    | <b>378.9</b> (377.5; 380.3)    | <b>485.7</b> (482.8; 488.7) | <b>399.1</b> (396.3; 401.9) | <b>384.0</b> (381.6; 386.5) |
|                        | 50 keV                    | <b>206.0</b> (205.0; 207.0)    | <b>270.9</b> (269.0; 272.7) | <b>201.3</b> (198.9; 203.7) | <b>200.5</b> (198.7; 202.4) |
|                        | 70 keV                    | <b>36.2</b> (35.6; 36.8)       | <b>59.7</b> (58.8; 60.6)    | <b>10.8</b> (8.9; 12.8)     | <b>12.5</b> (11.7; 13.3)    |
| Breast vs Muscle       | 40 keV                    | <b>44.2</b> (42.8; 45.6)       | <b>75.1</b> (73.0; 77.1)    | <b>57.0</b> (52.9; 61.1)    | <b>57.5</b> (56.3; 58.7)    |
|                        | 50 keV                    | <b>24.4</b> (23.3; 25.4)       | <b>42.5</b> (41.2; 43.9)    | <b>30.7</b> (28.3; 33.1)    | <b>28.7</b> (27.8; 29.6)    |
|                        | 70 keV                    | <b>5.0</b> (4.2; 5.7)          | <b>10.6</b> (9.9; 11.3)     | <b>3.6</b> (2.6; 4.6)       | -0.2 (-0.9; 0.6)            |
| Breast vs Liver        | 40 keV                    | <b>45.6</b> (44.5; 46.7)       | <b>83.0</b> (78.4; 87.6)    | <b>45.4</b> (42.7; 48.1)    | <b>60.4</b> (59.1; 61.8)    |
|                        | 50 keV                    | <b>25.0</b> (24.3; 25.8)       | <b>49.5</b> (46.5; 52.5)    | <b>23.2</b> (21.5; 24.8)    | <b>30.4</b> (29.5; 31.4)    |
|                        | 70 keV                    | <b>4.8</b> (4.3; 5.3)          | <b>16.7</b> (15.1; 18.3)    | 0.9 (0.2; 1.7)              | 0.3 (-0.3; 1.0)             |
| Muscle vs Bone 200 mg  | 40 keV                    | <b>305.1</b> (303.7; 306.5)    | <b>396.3</b> (393.6; 398.9) | <b>319.9</b> (317.2; 322.6) | <b>290.5</b> (287.8; 293.2) |
|                        | 50 keV                    | <b>165.5</b> (164.5; 166.6)    | <b>222.6</b> (220.9; 224.3) | <b>162.2</b> (160.5; 163.8) | <b>152.6</b> (150.5; 154.7) |
|                        | 70 keV                    | <b>28.4</b> (27.7; 29.1)       | <b>51.7</b> (50.6; 52.7)    | <b>8.0</b> (6.6; 9.4)       | <b>10.7</b> (9.8; 11.6)     |
| Liver vs Bone 200 mg   | 40 keV                    | <b>303.6</b> (302.4; 304.9)    | <b>388.3</b> (383.6; 393.1) | <b>331.5</b> (329.4; 333.6) | <b>287.6</b> (285.1; 290.0) |
|                        | 50 keV                    | <b>164.9</b> (164.0; 165.7)    | <b>215.6</b> (212.7; 218.5) | <b>169.7</b> (168.0; 171.4) | <b>150.9</b> (148.9; 152.9) |
|                        | 70 keV                    | <b>28.6</b> (28.0; 29.1)       | <b>45.6</b> (44.4; 46.8)    | <b>10.7</b> (9.0; 12.3)     | <b>10.2</b> (9.4; 11.0)     |

Abbreviations: DECT = dual-energy CT, SECT = single-energy CT, FBP = filtered back-projection, CI = confidence interval.

**Supplementary Table S4.** Mean difference (with unadjusted 95% confidence interval) between each of three VMI levels (40, 50, and 70 keV) of DECT with respect to SECT of all the pairwise comparison of five tissue-equivalent inserts for four CT scanners using iterative algorithms for reconstruction. Bold numbers indicate differences between VMI and SECT with statistical significance (p-value < 0.05/30 after multiple comparison correction with Bonferroni procedure).

Abbreviations: VMI = Virtual Monochromatic Image, SECT = single-energy CT, DECT = dual-energy CT, CI = confidence interval.

| Tissue Comparison      | DECT Level vs SECT images | Mean difference in HU (95% CI) |                             |                             |                             |
|------------------------|---------------------------|--------------------------------|-----------------------------|-----------------------------|-----------------------------|
|                        |                           | Confidence                     | Edge                        | Force                       | Revolution GSI              |
| Adipose vs Breast      | 40 keV                    | <b>29.2</b> (28.1; 30.3)       | <b>14.7</b> (11.9; 17.4)    | <b>20.8</b> (17.8; 23.8)    | <b>35.2</b> (34.2; 36.2)    |
|                        | 50 keV                    | <b>15.8</b> (15.1; 16.5)       | <b>5.8</b> (4.1; 7.5)       | <b>6.1</b> (3.6; 8.6)       | <b>18.8</b> (18.1; 19.5)    |
|                        | 70 keV                    | <b>2.6</b> (2.2; 3.1)          | <b>-2.8</b> (-3.6; -2.0)    | -1.2 (-2.0; -0.3)           | <b>2.2</b> (1.8; 2.7)       |
| Adipose vs Muscle      | 40 keV                    | <b>73.7</b> (72.5; 74.9)       | <b>90.0</b> (88.4; 91.6)    | <b>75.6</b> (71.1; 80.1)    | <b>92.5</b> (91.1; 93.8)    |
|                        | 50 keV                    | <b>40.2</b> (39.4; 41.0)       | <b>48.5</b> (47.5; 49.5)    | <b>36.2</b> (34.4; 37.9)    | <b>47.6</b> (46.7; 48.5)    |
|                        | 70 keV                    | <b>7.6</b> (7.2; 8.0)          | <b>8.0</b> (7.4; 8.6)       | <b>2.4</b> (1.4; 3.4)       | <b>1.9</b> (1.2; 2.6)       |
| Adipose vs Liver       | 40 keV                    | <b>74.2</b> (73.4; 74.9)       | <b>99.3</b> (96.5; 102.1)   | <b>64.8</b> (60.4; 69.1)    | <b>95.0</b> (93.9; 96.1)    |
|                        | 50 keV                    | <b>40.5</b> (40.0; 40.9)       | <b>56.5</b> (54.6; 58.4)    | <b>29.0</b> (27.3; 30.7)    | <b>49.9</b> (49.0; 50.7)    |
|                        | 70 keV                    | <b>7.3</b> (7.0; 7.7)          | <b>14.5</b> (13.4; 15.7)    | -0.2 (-1.1; 0.6)            | <b>2.8</b> (2.3; 3.4)       |
| Adipose vs Bone 200 mg | 40 keV                    | <b>379.5</b> (378.3; 380.8)    | <b>484.6</b> (481.7; 487.6) | <b>398.0</b> (393.0; 403.0) | <b>385.1</b> (382.7; 387.5) |
|                        | 50 keV                    | <b>206.4</b> (205.6; 207.2)    | <b>270.3</b> (268.5; 272.1) | <b>199.2</b> (197.0; 201.5) | <b>198.1</b> (196.6; 199.5) |
|                        | 70 keV                    | <b>36.3</b> (35.8; 36.7)       | <b>59.6</b> (58.7; 60.5)    | <b>10.0</b> (8.1; 11.9)     | <b>12.7</b> (12.1; 13.4)    |
| Breast vs Muscle       | 40 keV                    | <b>44.5</b> (43.6; 45.5)       | <b>75.3</b> (73.2; 77.4)    | <b>57.0</b> (53.3; 60.7)    | <b>57.3</b> (56.1; 58.4)    |
|                        | 50 keV                    | <b>24.4</b> (23.7; 25.2)       | <b>42.8</b> (41.4; 44.1)    | <b>30.0</b> (27.6; 32.5)    | <b>28.8</b> (27.9; 29.6)    |
|                        | 70 keV                    | <b>4.9</b> (4.4; 5.5)          | <b>10.8</b> (10.1; 11.5)    | <b>3.5</b> (2.5; 4.6)       | -0.3 (-1.0; 0.4)            |
| Breast vs Liver        | 40 keV                    | <b>45.0</b> (44.1; 45.8)       | <b>84.6</b> (80.0; 89.3)    | <b>46.2</b> (43.4; 48.9)    | <b>59.8</b> (58.4; 61.2)    |
|                        | 50 keV                    | <b>24.7</b> (24.0; 25.3)       | <b>50.7</b> (47.7; 53.8)    | <b>22.9</b> (21.3; 24.4)    | <b>31.1</b> (30.0; 32.1)    |
|                        | 70 keV                    | <b>4.7</b> (4.3; 5.1)          | <b>17.3</b> (15.7; 19.0)    | 0.9 (0.2; 1.6)              | 0.6 (0.0; 1.2)              |
| Breast vs Bone 200 mg  | 40 keV                    | <b>350.3</b> (349.1; 351.6)    | <b>470.0</b> (467.9; 472.1) | <b>379.4</b> (376.5; 382.2) | <b>349.9</b> (347.7; 352.2) |
|                        | 50 keV                    | <b>190.6</b> (189.8; 191.5)    | <b>264.5</b> (263.0; 266.0) | <b>193.1</b> (190.9; 195.2) | <b>179.3</b> (177.9; 180.6) |
|                        | 70 keV                    | <b>33.6</b> (33.1; 34.1)       | <b>62.4</b> (61.2; 63.6)    | <b>11.2</b> (9.4; 13.0)     | <b>10.5</b> (9.9; 11.1)     |
| Muscle vs Liver        | 40 keV                    | 0.5 (-0.5; 1.4)                | <b>9.4</b> (6.6; 12.3)      | <b>-3.5</b> (-5.0; -2.0)    | 2.6 (0.9; 4.2)              |
|                        | 50 keV                    | 0.2 (-0.5; 0.9)                | <b>8.0</b> (6.0; 9.9)       | <b>-4.8</b> (-5.8; -3.8)    | <b>2.3</b> (1.2; 3.3)       |
|                        | 70 keV                    | -0.2 (-0.7; 0.2)               | <b>6.5</b> (5.4; 7.7)       | <b>-2.6</b> (-3.4; -1.9)    | 0.9 (0.3; 1.6)              |
| Muscle vs Bone 200 mg  | 40 keV                    | <b>305.8</b> (304.8; 306.8)    | <b>394.7</b> (392.0; 397.3) | <b>322.4</b> (320.1; 324.7) | <b>292.7</b> (290.1; 295.3) |
|                        | 50 keV                    | <b>166.2</b> (165.4; 166.9)    | <b>221.7</b> (220.1; 223.4) | <b>163.0</b> (161.4; 164.6) | <b>150.5</b> (148.9; 152.1) |
|                        | 70 keV                    | <b>28.7</b> (28.2; 29.2)       | <b>51.6</b> (50.5; 52.6)    | <b>7.6</b> (6.3; 9.0)       | <b>10.8</b> (10.1; 11.6)    |

**Supplementary Figure S1.** Comparison of the average SNR between SECT and DECT for five equivalent soft tissue phantom inserts in the Siemens Confidence, Siemens Edge, Siemens Force, and GE Revolution GSI CT scanners, using FBP reconstruction method. Dots represent average SNR values and segments extend from minimum to maximum SNR values. Up arrows indicate when DECT has significantly higher SNR than SECT, whereas down arrows when DECT has significantly lower SNR than SECT. P-values were computed with the Wilcoxon test for paired samples and adjusted with Bonferroni procedure; the adjusted significance level was  $p < 0.05/30$ .

Abbreviations: SNR = Signal-to-Noise Ratio, CT = Computed Tomography, SECT = Single-Energy CT, DECT = Dual-Energy CT, FBP= filtered back-projection.

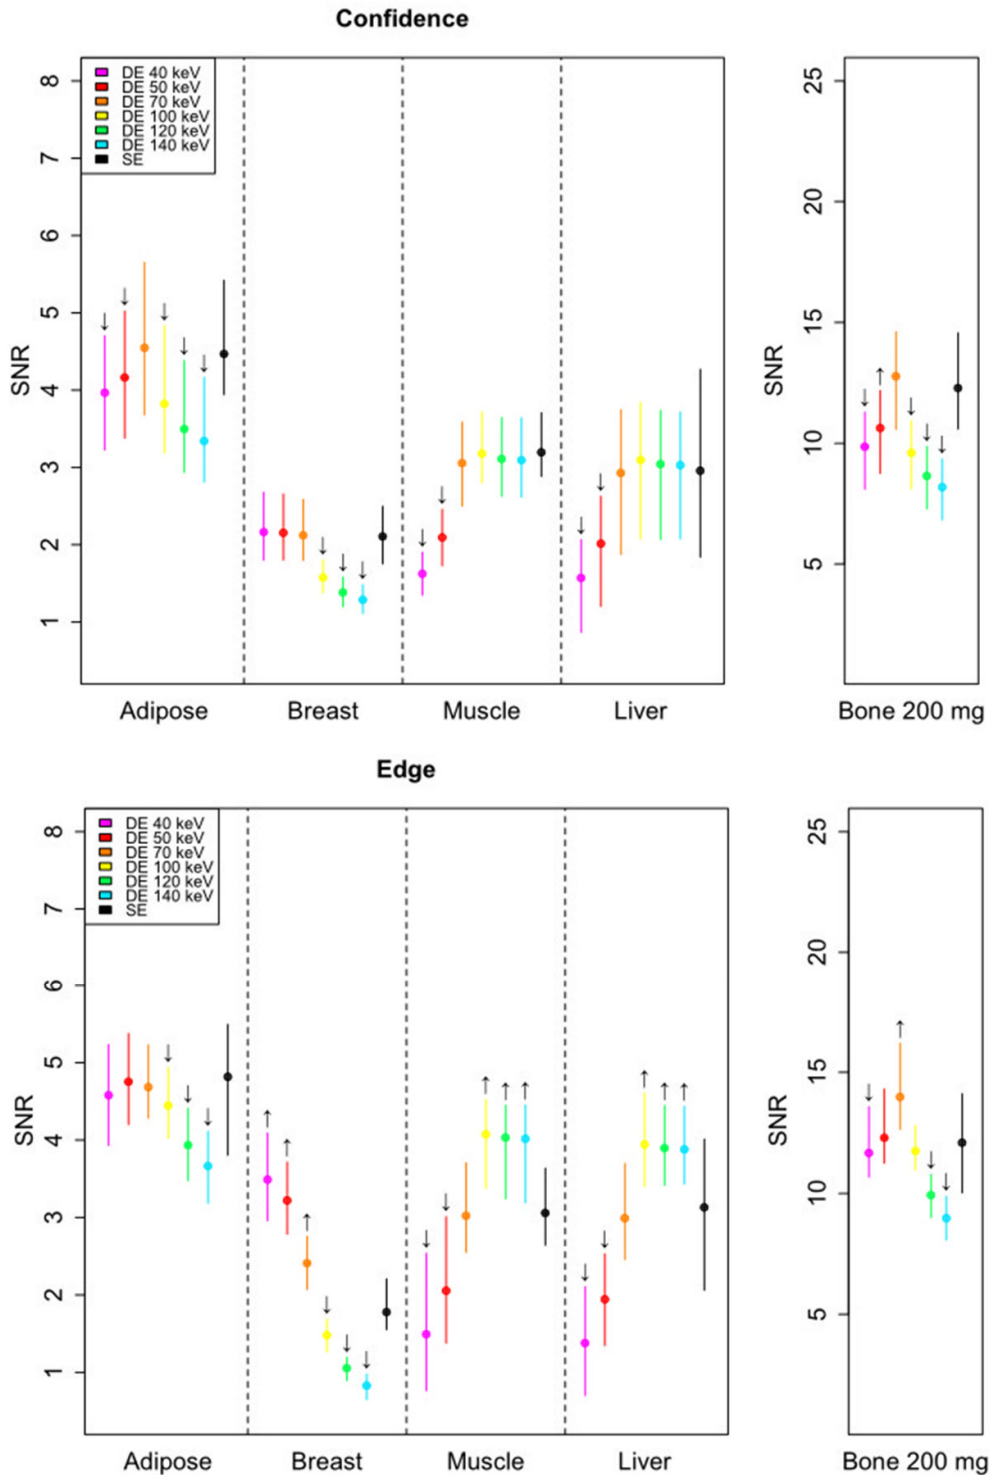

Supplementary Figure S1 (continued)

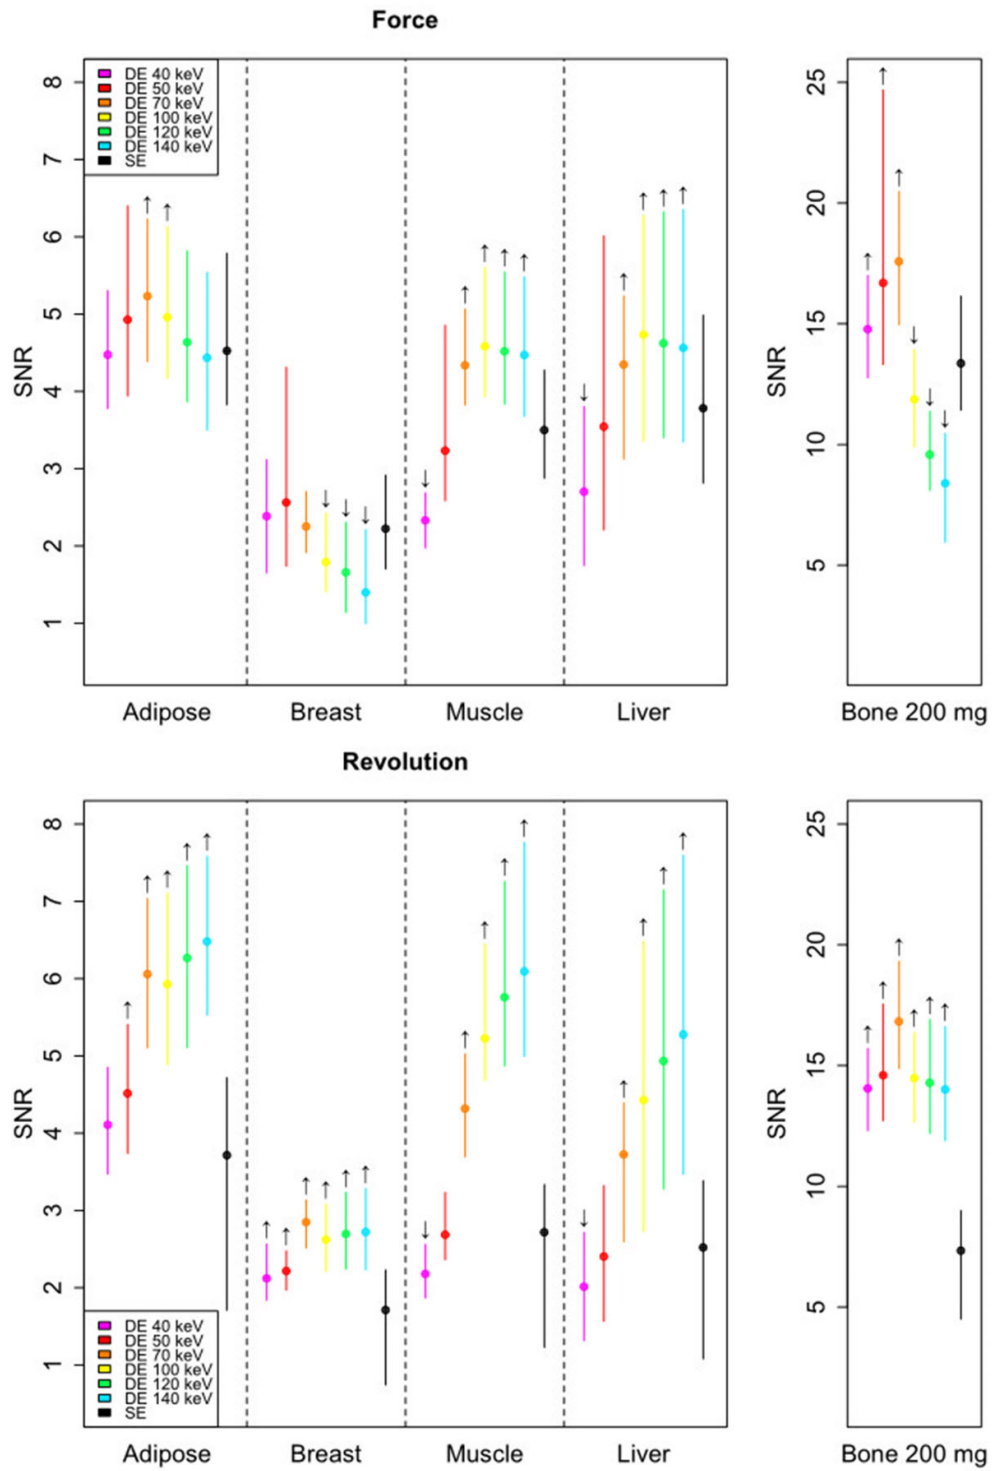

**Supplementary Figure S2.** Comparison of the average SNR between SECT and DECT for five equivalent soft tissue phantom inserts in the Siemens Confidence, Siemens Edge, Siemens Force, and GE Revolution GSI CT scanners, using iterative reconstruction methods. Dots represent average SNR values and segments extend from minimum to maximum SNR values. Up arrows indicate when DECT has significantly higher SNR than SECT, whereas down arrows when DECT has significantly lower SNR than SECT. P-values were computed with the Wilcoxon test for paired samples and adjusted with Bonferroni procedure; the adjusted significance level was  $p < 0.05/30$ . Abbreviations: SNR = signal-to-noise ratio, SECT = single-energy CT, DECT = dual-energy CT.

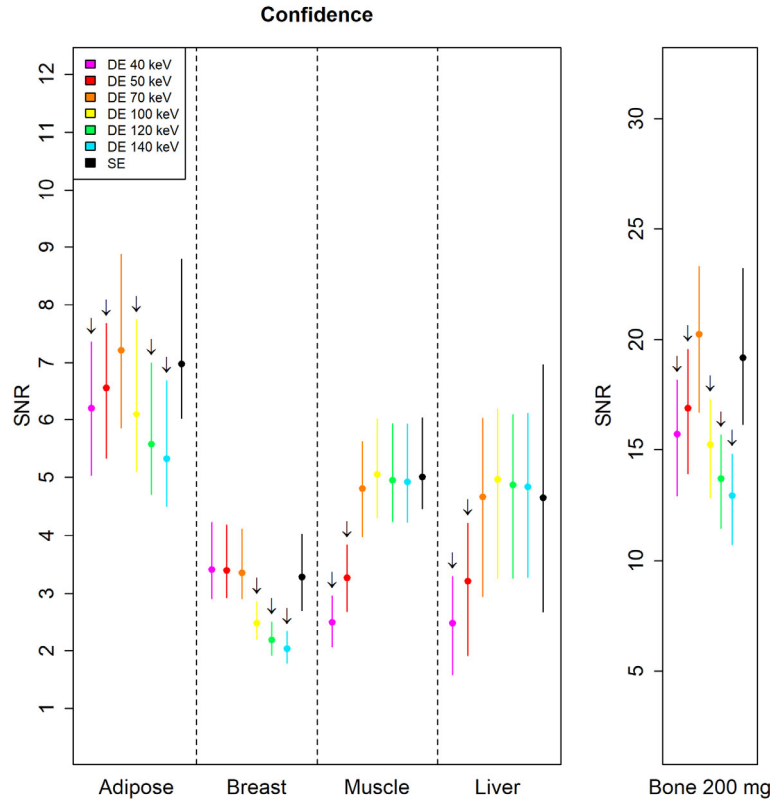

Supplementary Figure S2 (continued)

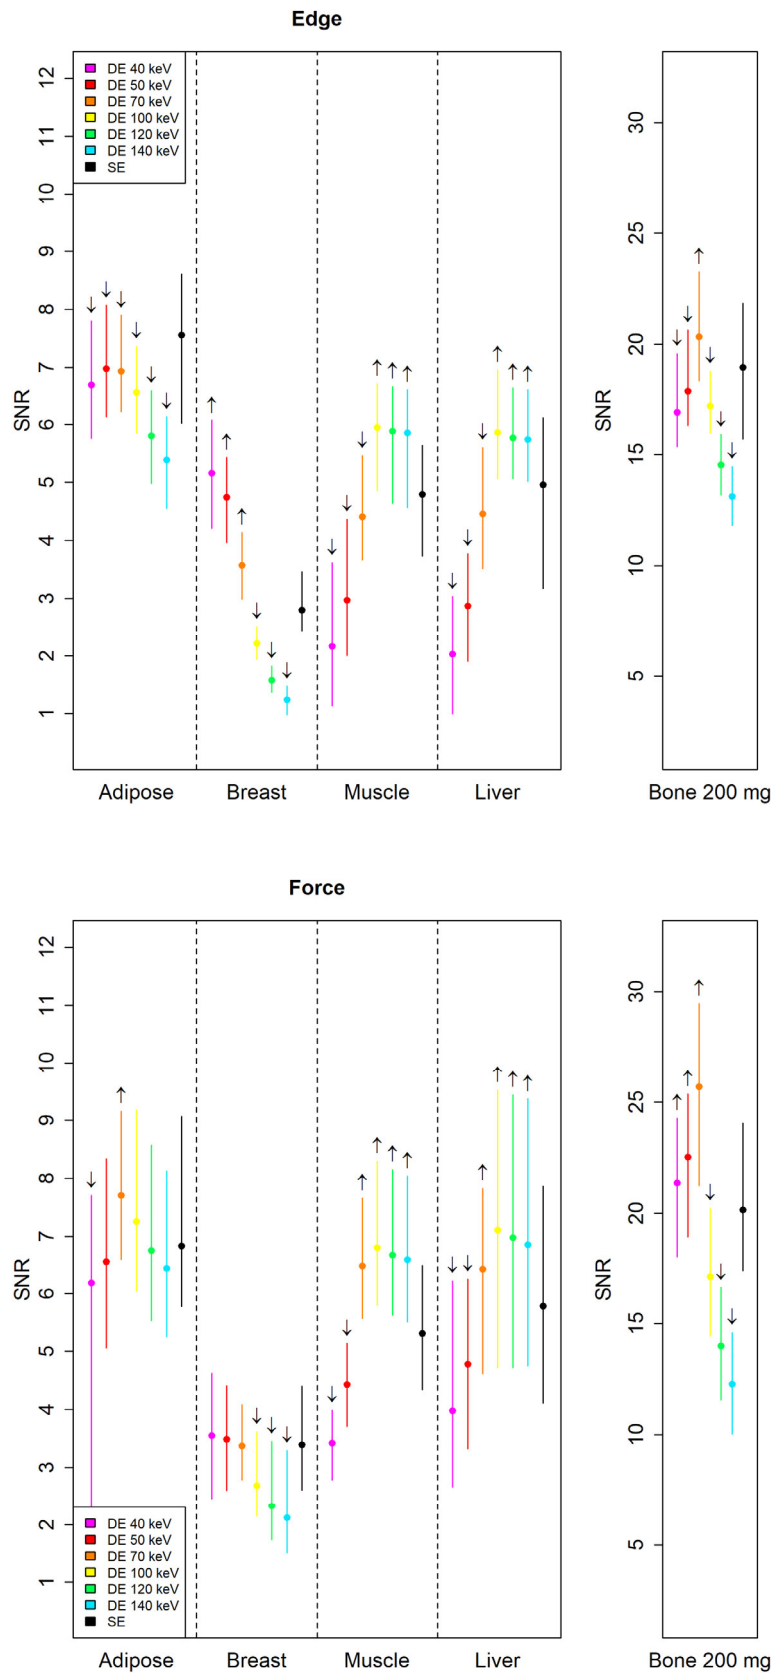



Supplementary Figure S2 (continued)

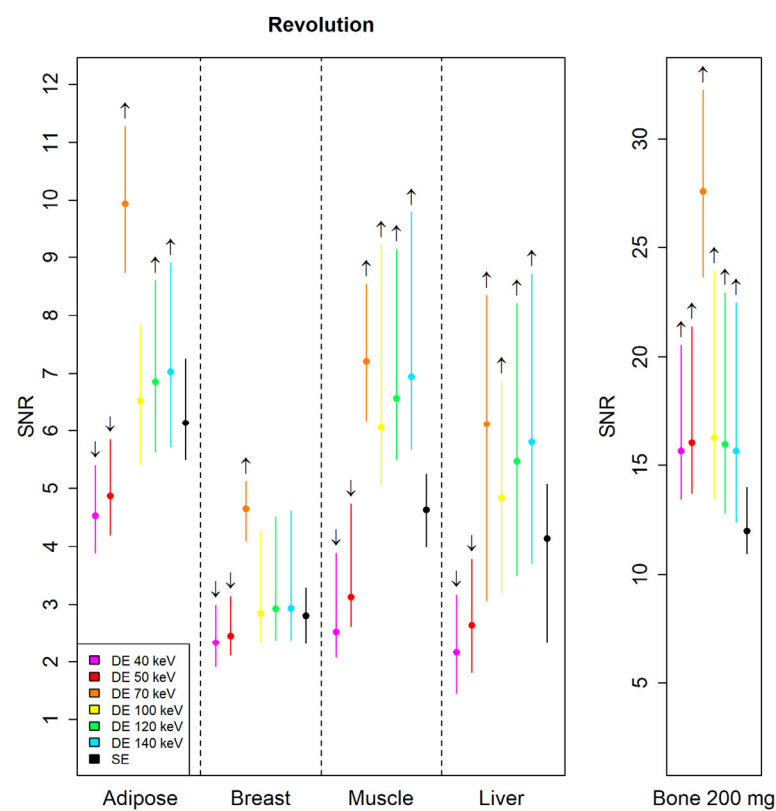

Supplement: s1 [file s1]
